# Supplementary material
Source: Elsevier journal article supplement (https://www.sciencedirect.com/science/article/pii/S0960982214010471)
Supplement: mmc1 [file 1-s2.0-S0960982214010471-mmc1.pdf]

**Current Biology, Volume 24**

**Supplemental Information**

**Gradual Assembly of Avian Body Plan  
Culminated in Rapid Rates of Evolution  
across the Dinosaur-Bird Transition**

**Stephen L. Brusatte, Graeme T. Lloyd, Steve C. Wang, and Mark A. Norell**

## Supplemental Data

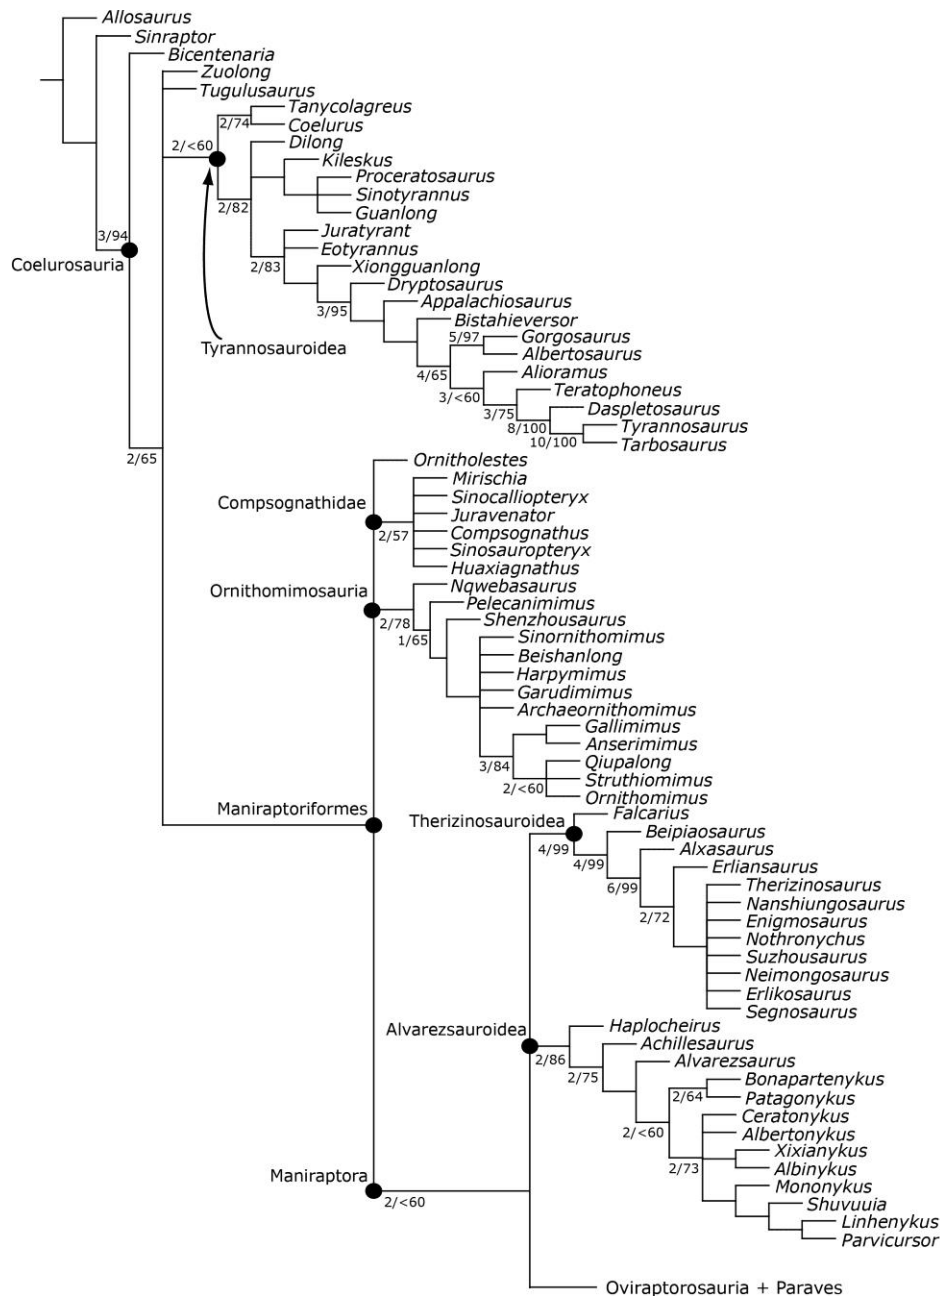

Figure S1, Related to Figure 1. Reduced strict consensus of the 99999 most parsimonious trees recovered by the cladistic analysis (tree length=3360 steps; consistency index=0.322; retention index=0.777). The reduced strict consensus is calculated after the a posteriori removal of five taxa: *Kinnareemimus*, *Epidendrosaurus*, *Pyroraptor*, *Hesperonychus*, and *Limenavis*. Numbers next to nodes denote Bremer support value/jackknife percentage. Those nodes without any numbers are characterized by Bremer values of 1 and a jackknife percentage of less than 60%. The Oviraptorosauria + Paraves clade is collapsed here for space reasons but is fully shown in the following figure (Figure S2).

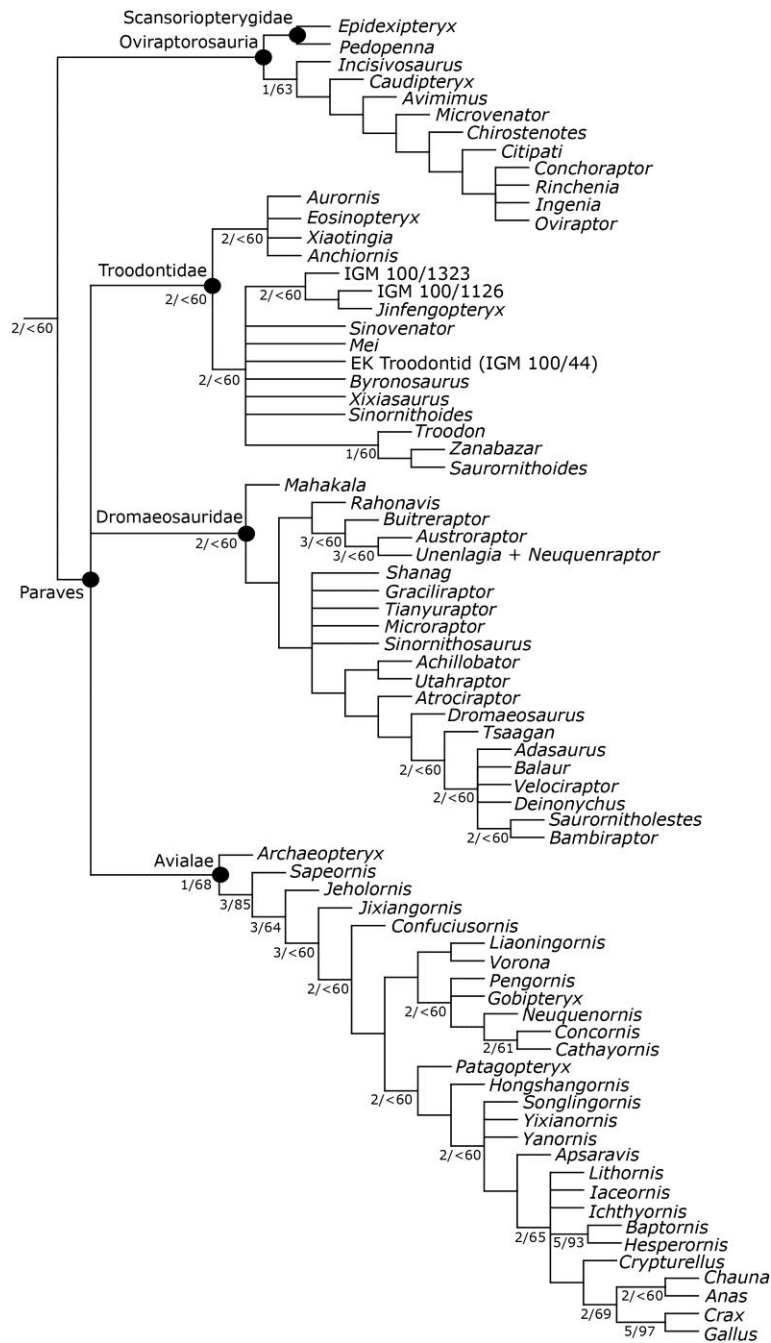

Figure S2, Related to Figure 1. Reduced strict consensus relationships within the Oviraptorosauria + Paraves clade (see the placement of this clade among higher-level coelurosaur phylogeny in Figure S1 above). Refer to the caption of Figure S1 for explanation.

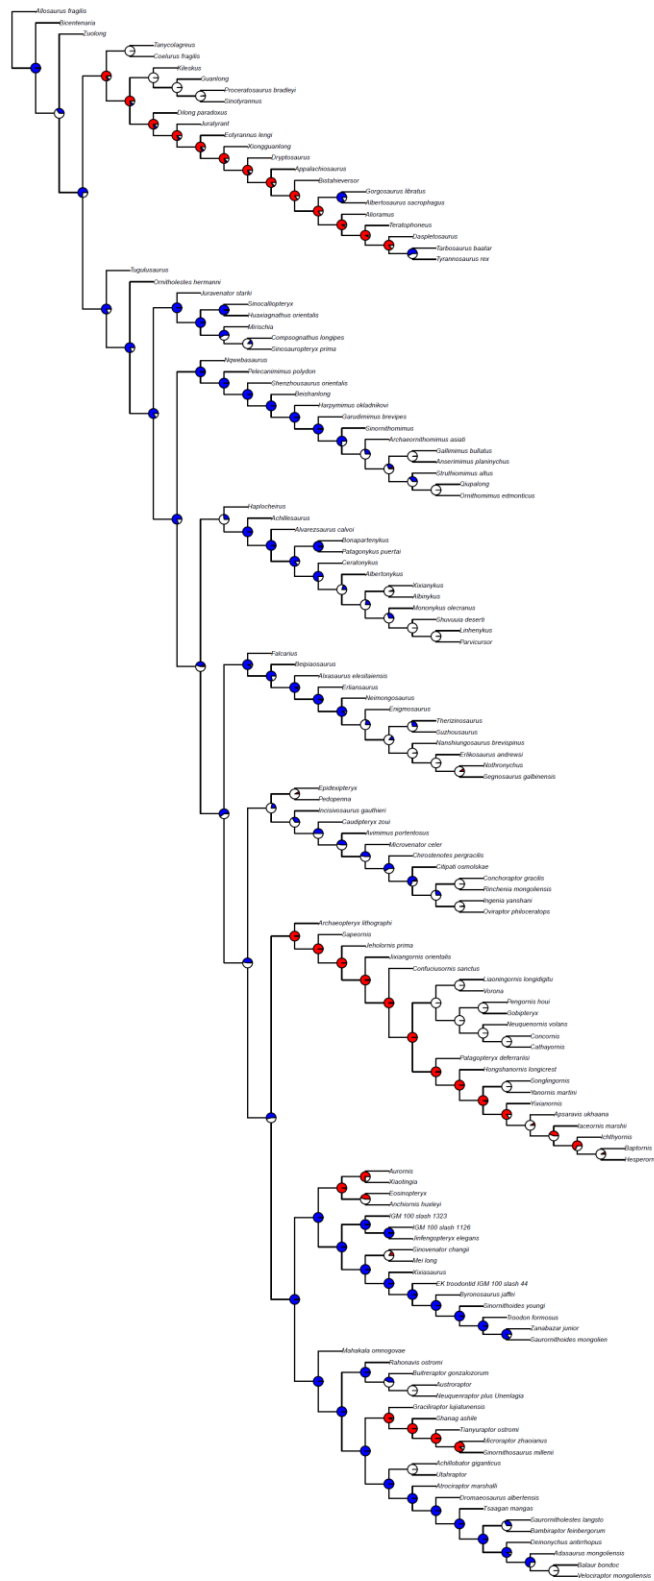

Figure S3, Related to Figure 2. Results of 100 dating uncertainty replicates for the clade test on the first sampled tree. For a higher resolution version of the figure please see our Dryad appendix.

**Table S1, Related to Disparity and Morphospace Occupation: Morphospace Separation Tests Comparing Avialans vs. Other Coelurosaurs**

*Avialans vs. All Other Coelurosaurs*

Permutation (2000 replicates, Mesozoic avialans only): Mahalanobis distance=205.91, p=0.02049

Permutation (2000 replicates, all avialans): Mahalanobis distance=168.64, p=0.00049975

Permutation (2000 replicates, *Anchiornis*, *Aurornis*, *Xiaotingia* as avialans): Mahalanobis distance=122.99, p=0.0034983

*Additional Comparisons for Context*

Dromaeosaurids vs. all other coelurosaurs: Mahalanobis distance=124.61, p=0.0195

Troodontids vs. all other coelurosaurs: Mahalanobis distance=104.13, p=0.16542

Oviraptorosaurs vs. all other coelurosaurs: Mahalanobis distance=179.14, p=0.16342

Ornithomimosaurids vs. all other coelurosaurs: Mahalanobis distance=260.96, p=0.011494

Therizinosauroids vs. all other coelurosaurs: Mahalanobis distance=142.8, p=0.13643

Alvarezsauroids vs. all other coelurosaurs: Mahalanobis distance=100.22, p=0.34733

Compsognathids vs. all other coelurosaurs: Mahalanobis distance=396.97, p=0.096452

Tyrannosauroids vs. all other coelurosaurs: Mahalanobis distance=108.64, p=0.084958

Deinonychosaurs vs. all other coelurosaurs: Mahalanobis distance=131.79, p=0.0009995

**Table S2, Related to Disparity and Morphospace Occupation: Morphospace Separation Tests Comparing Avialans vs. Sister Taxa/Closest Relatives**

***Deinonychosaurs vs. Avialans***

Permutation (2000 replicates, Mesozoic avialans only, on only 57 PC axes): Mahalanobis distance=7636.3, p=0.14393

Permutation (2000 replicates, all avialans, on only first 63 PC axes): Mahalanobis distance=1445.6, p=0.30035

Permutation (2000 replicates, *Anchiornis*, *Aurornis*, *Xiaotingia* as avialans, on only first 63 PC axes): Mahalanobis distance=354.79, p=0.6017

***Dromaeosaurids vs. Avialans***

Permutation (2000 replicates, Mesozoic avialans only, on only 41 PC axes): Mahalanobis distance=4154.1, p=0.16092

Permutation (2000 replicates, all avialans, on only first 47 PC axes): Mahalanobis distance=2231.2, p=0.21689

Permutation (2000 replicates, *Anchiornis*, *Aurornis*, *Xiaotingia* as avialans, on only first 50 PC axes): Mahalanobis distance=829.46, p=0.38181

***Troodontids vs. Avialans***

Permutation (2000 replicates, Mesozoic avialans only, on only 36 PC axes): Mahalanobis distance=32207, p=0.05997

Permutation (2000 replicates, all avialans, on only first 42 PC axes): Mahalanobis distance=831780, p=0.014493

Permutation (2000 replicates, *Anchiornis*, *Aurornis*, *Xiaotingia* as avialans, on only first 42 PC axes): Mahalanobis distance=91317, p=0.034983

***Additional Comparisons for Context***

Compsognathids vs. ornithomimosaurids: 17 axes, Mahalanobis distance=3900.2, p=0.10345

Therizinosauroids vs. alvarezsauroids: 23 axes, Mahalanobis distance=1666.2, p=0.17791

Troodontids vs. dromaeosaurids: 35 axes, Mahalanobis distance=381.96, p=0.41679

Oviraptorosaurs vs. deinonychosaurs: 45 axes, Mahalanobis distance=135.71, p=0.037981

Ornithomimosaurids vs. alvarezsauroids: 24 axes, Mahalanobis distance=146.34, p=0.11094

Compsognathids vs. tyrannosauroids: 21 axes, Mahalanobis distance=132.31, p=0.21239

Ornithomimosaurids vs. tyrannosauroids: 29 axes, Mahalanobis distance=783720, p=0.00049975

Oviraptorosaurs vs. therizinosauroids: 20 axes, Mahalanobis distance=29042, p=0.032984

**Table S3, Related to Disparity and Morphospace Occupation: Comparative Disparity Values**

| <i>Group</i>       | <i>SoR</i> | <i>PoR</i> | <i>SoV</i> | <i>PoV</i> |
|--------------------|------------|------------|------------|------------|
| Mesozoic avialans  | 15158      | 117        | 114969     | 829        |
| alvarezsauroids    | 12428      | 94         | 104782     | 689        |
| compsognathids     | 8926       | 60         | 115644     | 509        |
| dromaeosaurids     | 15260      | 118        | 114125     | 836        |
| ornithomimosaurids | 12941      | 97         | 114011     | 754        |
| oviraptorosaurs    | 11805      | 90         | 115127     | 754        |
| therizinosauroids  | 12168      | 91         | 105167     | 667        |
| troodontids        | 14160      | 109        | 111963     | 791        |
| tyrannosauroids    | 15069      | 114        | 111335     | 754        |

(SoR=sum of ranges; PoR=product of ranges; SoV=sum of variances; PoV=product of variances)

## Supplemental Experimental Procedures

**Note: Datasets, appendices and code relevant to this section are posted on Dryad:  
doi:10.5061/dryad.84t75**

### 1) Phylogenetic Analysis

**Taxon Sampling:** The cladistic analysis includes 152 taxa scored for 853 characters. This analysis is an expanded version of the American Museum of Natural History's Theropod Working group (TWiG) dataset. This dataset has grown iteratively over the past decade with the addition of new taxa and characters, and previous versions have been presented by [S1-S10]. The most recent versions include a large amount of data relevant to avialan phylogeny that was originally presented by [S11]. These studies are considered precursors to the current analysis and many of the character data employed here were first established in these earlier works. Several other authors have also used published TWiG phylogenies as a backbone for additional phylogenetic work, especially analyses targeting the interrelationships of certain coelurosaurian subgroups [eg. S12-S21].

The focus of most previous work from the Theropod Working Group, and the focal point of all published TWiG phylogenies, is maniraptoran theropods (therizinosauroids, oviraptorosauroids, paravians, most likely alvarezsauroids). More specifically, the overwhelming focus has been on the paravian theropods, which include dromaeosaurids, troodontids, and avialans (birds). This focus reflects longstanding interest in the origin of birds and the relationships of birds and their closest dinosaurian relatives. In this paper we add a wealth of new data relevant to non-maniraptoran "basal" coelurosaurs (tyrannosauroids, ornithomimosaurids, compsognathids, and many singleton taxa), as well as non-paravian maniraptorans (therizinosauroids, alvarezsauroids). As a result, the cladistic analysis presented here includes a nearly complete sample of Mesozoic coelurosaurs, but the majority of new data (new characters and taxa, revised character scores) are relevant to "basal" coelurosaurs. Compared to the hitherto most recent TWiG dataset [S9], this analysis includes 41 new taxa, all of which are "basal" coelurosaurs except for two derived paravians closely related to birds that have been described very recently (*Eosinopteryx*, *Aurornis*). This section includes a list of "basal" coelurosaurs included in the analysis, sources of coding data, and notes relevant to individual taxa.

**General Comments:** The starting point for this analysis was the latest published version of the TWiG dataset [S9]. As previous TWiG work has largely focused on the paravian theropods, character scores for these taxa were mostly accepted without revision. In some cases, however, paravian taxa had to be rescored when characters were modified (e.g., by the addition of one or more new states to encapsulate wider variation among coelurosaurs). Character scores for non-paravian maniraptorans were also largely accepted without critical revision, although scores relevant to therizinosauroids and alvarezsauroids were carefully checked. Character scores for non-maniraptoran "basal" coelurosaurs, however, were carefully checked and in some cases modified. Several new "basal" coelurosaurs, alvarezsauroids, and therizinosauroids were added to the dataset of [S9], along with the paravians *Eosinopteryx* and *Aurornis*, but no new oviraptorosauroids were added. The analysis presented here includes several new characters and these were scored for both "basal" coelurosaurs and maniraptorans. The following is a brief description of taxon data sources; a full explanation can be found in [S22].

**Outgroup Taxa:** The outgroups employed here are the non-coelurosaurian tetanurans *Allosaurus* and *Sinraptor*. These taxa were scored based on the literature and personal observation of specimens. The Utah Museum of Natural History, American Museum of Natural History, and Carnegie Museum of Natural History collections of *Allosaurus* were studied firsthand, as was the holotype of *Sinraptor*



(IVPP 10600). Monographs of both taxa were also used to score characters (*Allosaurus*: [S23]; *Sinraptor*: [S24]).

**Paravians, Oviraptorosaurs, and Therizinosauroids:** Maniraptorans were scored for new characters based on the literature and personal observation of specimens. Several maniraptorans were studied firsthand as part of this project. The complete Utah Museum of Natural History collection of the basal therizinosauroid *Falcarius* was studied, as was the American Museum of Natural History temporary collection of IGM Gobi oviraptorosauroid material. Characters were also scored directly for some Mongolian troodontids from the AMNH and IGM collections (*Byronosaurus*: IGM 100/983; *Saurornithoides*: AMNH FARB 6516), although most new scores for troodontids were based on the literature (including those for *Eosinopteryx* and *Aurornis*). Several dromaeosaurids were studied firsthand, including *Austroraptor* (MML 195), *Balaur* (EME PV.313; LVP [FGGUB] R.1580-1585), *Bambiraptor* (AMNH FR 30556), *Buitreraptor* (MPCA 245, 238), *Deinonychus* (YPM 5025 and hypodigm series), *Dromaeosaurus* (AMNH FARB 5356), *Tsaagan* (IGM 100/1015), *Unenlagia/Neuquenraptor* (MCF PVPH 77, 78), and *Velociraptor* (AMNH temporary collection of IGM specimens: see [S25-S26]). Finally, the basal avialan *Archaeopteryx* was also observed firsthand (Berlin and Eichstatt specimens), as was the enigmatic *Epidexipteryx* (IVPP V15471).

Note that for all new characters, the five extant bird taxa included in the dataset (*Crypturellus*, *Chauna*, *Anas*, *Crax*, and *Gallus*) were scored in a very conservative manner, due to the great morphological differences between extant birds and “basal” coelurosaurs (which all new characters relate to). This was a pragmatic decision because it is often very difficult to confidently score living taxa for characters relevant to taxa such as tyrannosauroids and therizinosauroids, and therefore the possibility of making incorrect primary homology hypotheses is high. The extant birds have essentially been scored for only those characters that relate to skeletal ratios or measurements, or straightforward anatomical features that require no ambiguity to score in the living species.

**Alvarezsauroids:** The alvarezsauroids *Mononykus* (AMNH IGM collection, including casts), *Patagonykus* (MCF PVPH 37), and *Shuvuuia* (IGM 100/975, 100/99, 100/10001) were studied firsthand. The basal alvarezsauroid *Haplocheirus* was scored based on extensive photographs provided by Jonah Choiniere, as well as the initial description of the taxon [S18]. Other alvarezsauroids were scored based on the literature and on notes and advice provided by Choiniere, whose dissertation and postdoctoral work focused largely on alvarezsauroids. Character scores for TWiG characters and some new characters were taken from [S18-20]. These scores were carefully checked and in rare cases modified.

**Tyrannosauroids:** The character dataset of [S27], which focused on the ingroup phylogeny of tyrannosauroids, was incorporated into the dataset used here. The tyrannosauroid dataset was constructed based on extensive first-hand observation of tyrannosauroid specimens, as detailed by [S22, S27].

**Ornithomimosaurs:** Several ornithomimosaurian taxa were studied firsthand whereas others were scored based on the literature and photographs. Studied specimens include the holotype of *Pelecanimimus polydon* (LH 7777), the holotype of *Shenzhousaurus orientalis* (NGMC 97-4-002), the full lectotype and paratype series of *Archaeornithomimus asiaticus* (American Museum of Natural History specimens), casts of *Sinornithomimus dongi* in the University of Chicago research collection, the vast Polish Academy of Sciences collection of *Gallimimus bullatus* and the well-preserved *Gallimimus* skull IGM 100/1133, and the collection of *Struthiomimus altus* and *Ornithomimus edmonticus* material in the AMNH and Royal Ontario Museum collections.

There is considerable uncertainty about the alpha level taxonomy of Late Cretaceous ornithomimosaur from North America, particularly the number of different species among specimens that are commonly referred to as *Struthiomimus*, *Ornithomimus*, and *Dromiceiomimus* (see [S28]). The likely synonymy of *Ornithomimus* and *Dromiceiomimus* is accepted here, but considerable specimen-level work on North American Late Cretaceous ornithomimosaur is needed before the systematics of these taxa are resolved. We consider those specimens labeled as *Struthiomimus* in the AMNH collection to belong to this taxon, and consider keystone specimens of *Struthiomimus* and *Ornithomimus* described in publications such as [S28-S29] to belong to the taxon they are assigned to. We are cognizant, however, that future work may show that some of these assignments are incorrect.

**Compsognathids and Additional Basal Coelurosaurs:** Many compsognathids and other basal coelurosaurs were studied firsthand whereas others were scored based on the literature and photographs. Studied specimens include the holotype and syntype of *Coelurus fragilis* (YPM 2012, 1991-1993), the holotype (BSP AS I 563) and the referred French specimen (MNHN CNJ 79) of *Compsognathus longipes*, the holotype of *Juravenator starki* (JME Sch 200), the holotype of *Mirischia asymmetrica* (SMNK 2349 PAL), the holotype of *Ornitholestes hermanni* (AMNH FARB 619), the holotype of *Sinosauropteryx prima* (NGMC 2123), the holotype of *Tanycolagreus topwilsoni* (TPII 2000-09-29), and the holotype of *Tugulusaurus faciles* (IVPP V4025).

**Excluded Taxa:** Some “basal” coelurosaur taxa were excluded from the analysis for various reasons. Some taxa were excluded because they are represented only by highly immature specimens, and therefore the sub-adult or adult morphologies of these taxa are unknown. It is likely that such immature specimens would not be placed accurately in a phylogenetic analysis, and thus these taxa were excluded. *Scipionyx* was not included because the holotype and only known specimen is a remarkably young individual, which perhaps died soon after hatching [S30-S31]. Similarly, the tyrannosauroid *Raptorex* was excluded because its holotype is also a young individual which probably died within the first five years of life [S32]. Note, however, that a few taxa are included in the analysis even though they are based on young specimens (e.g., *Juravenator* and potentially other compsognathids, *Epidendrosaurus*). All compsognathid taxa are retained because detailed histological data on the ages of the relevant specimens is not yet available. Furthermore, *Juravenator* is retained because it is known from a nearly complete skeleton that can be scored for more characters than nearly any other basal coelurosaur, whereas *Epidendrosaurus* is retained because it is one of the few examples of a newly discovered and aberrant coelurosaurian subgroup, Scansoriopterygidae, whose phylogenetic placement demands testing in a large-scale analysis. However, when both *Juravenator* and *Epidendrosaurus* are removed in certain iterations of this analysis to gauge the effect of their inclusion on the results, the topology of the remainder of the tree does not change.

Other taxa were excluded because they are known only from highly incomplete remains and/or because they are not described in detail in the literature. These taxa were carefully considered during the start of this project and were excluded when it became clear that they could not be scored for the vast majority of characters in the analysis. Some of these taxa could potentially be included, but were stricken from the analysis because they were not examined firsthand and are the subject of only brief reports in the literature. *Xinjiangovenator* was excluded because it is represented only by fragmentary hindlimb material (tibia and fibula: [S33]), whereas *Santanaraptor* [S34] and *Yixianosaurus* [S35-36] were excluded because they are known from fragmentary specimens that were not able to be observed firsthand. Finally, the recently described *Yutyranus* was excluded even though it is known from a reasonably complete specimen [S37]. This decision was made because it has yet to be examined firsthand and the published figures are not adequate for carefully checking the character scores used by the authors in their phylogenetic analysis, which is a variation of the Brusatte et al. [S27] analysis that is incorporated into this dataset.

Other taxa are excluded because of serious doubts regarding their coelurosaurian affinities or their taxonomic status. *Aniksoosaurus* was not included because it is unclear if it possesses any clear coelurosaurian characters [S38]. Material of *Nedcolbertia* was examined firsthand as part of this project (CEUM 5071-5073), but this taxon was excluded because it is unclear if all of the referred material (which comes from several individuals) belongs to the same taxon. Furthermore, the histological ages of the specimens are uncertain, leaving open the possibility that some or all of them represent very young individuals and/or juveniles of a large-bodied non-coelurosaurian theropod. For more information on this taxon see [S39]. *Bagaraatan* was excluded because it is strongly suspected that the holotype material described by [S40] is a chimera of tyrannosauroid and non-tyrannosauroid coelurosaurian material (P. Makovicky, pers. comm., corroborated by specimen observation of SLB). The tyrannosauroid *Alectrosaurus* is excluded because this taxon is currently under revision by Thomas Carr, and the derived tyrannosaurid *Zhuchengtyrannus* [S41] is excluded because it is unclear if this taxon, represented only by a few fragmentary skull bones, can be differentiated from *Tarbosaurus*. Finally, note that the Argentine taxon *Orkoraptor*, which appears in many phylogenetic analyses of Coelurosauria, is not included here because recent work convincingly shows that this taxon belongs to the non-coelurosaurian clade Neovenatoridae [S42].

**Character Sampling and Scoring:** As outlined above, previous versions of the Theropod Working Group (TWiG) matrix have focused predominately on maniraptoran theropods, especially dromaeosaurids, troodontids, and avialans. A major goal of this project was to expand taxon and character sampling relevant to more “basal” coelurosaurian theropods such as tyrannosauroids and ornithomimosaurids, so that the TWiG dataset now represents a more-or-less complete coverage of coelurosaurian taxa and characters.

The character list employed here is built upon the most recent published version of the TWiG dataset [S9]. The Turner et al. (2012) [S9] dataset included 474 characters, among which are characters used in previous TWiG analyses, characters relevant to avialan phylogeny published by Clarke et al. (2006) [S11], and new characters outlined by Turner et al. that were gleaned from new research or scrutiny of other published theropod phylogenies. These characters are included in the current dataset. In the current analysis, however, some of these characters have been expanded with the addition of new states or redefined, in order to better account for the full range of morphological variation expressed by coelurosaurs (e.g., so they could be scored in taxa as disparate as tyrannosauroids and basal birds). Some have also been divided into multiple characters, to ensure character independence. We have also attempted to standardize character statements by subtly rewriting each character so that the relevant bone (or other portion of the anatomy) is listed first, followed by the aspect of that feature that varies among taxa, followed by the category of variation (number, form, etc.), followed by the types of variation (the character states) [S43].

In addition to the 474 characters employed by Turner et al. (2012) [S9], the current analysis includes an additional 379 characters, resulting in a total of 853 characters. These new characters were compiled from several sources. Most new characters are novel characters stemming from this project, many of which are relevant to the ingroup relationship of tyrannosauroids and were published by [S27]. Other sources of new characters include recent phylogenetic analyses of basal coelurosaurian subgroups such as ornithomimosaurids [S44-45], therizinosauroids [S16-S17], and alvarezsauroids [S18-S19]. The character lists in these analyses were carefully scrutinized and we retained all those characters that were not redundant with current TWiG characters, were understandable, and were consistent with personal observations of specimens. Finally, 28 new characters that were not previously published were also included.

The full list of 853 characters is presented in our Dryad Supplementary Appendix 1. Characters used by Turner et al. (2012) [S9] are listed first, followed by a handful of new characters created when original TWiG characters were divided into two or more characters, and then followed by the

characters added to the TWiG dataset in this project. Among these new characters, those presented by Brusatte et al. (2010) [S27] are listed first, followed by those added from other published datasets, and finally followed by the 28 characters completely new to this paper. Note that several characters (142 in total) are treated as ordered because they describe numerical transformational sequences (e.g. two vertebrae-three vertebrae-four vertebrae), nested sets of homologies (e.g., small process, medium process, large process), or combine presence/absence and transformational data (e.g., process absent, process small, process large). These decisions were based upon prior TWiG usage and the recent proposals of [S43, S46]. Each multistate character is denoted as either ordered or unordered in Dryad Supplementary Appendix 1. The character dataset is provided in our Dryad Supplementary Appendix 2.

**Methodological Protocols:** The dataset was analyzed with equally weighted parsimony in the phylogenetic program TNT v. 1.1 [S47]. Following previous TWiG protocol, the outgroup *Allosaurus* was used to root the tree because it the best known, most extensively studied, and best described of the two outgroup taxa. Because of the large size of the dataset a heuristic search strategy was necessary. As a first step the data matrix was analyzed under the “New Technology” search options, using sectorial search, ratchet, tree drift, and tree fuse options with default parameters. The minimum length tree was found in 10 replicates, a procedure that aims to initially sample as many tree islands as possible. The generated trees were then analyzed under traditional TBR branch swapping, a procedure that aims to more fully explore each tree island. Zero-length branches were collapsed following Rule 1 of [S48].

### **Cladistic Analysis: Results:**

**Most Parsimonious Topologies:** The initial New Technology search recovered 75 most parsimonious trees (MPTs) of 3360 steps (consistency index=0.322; retention index=0.777). Additional TBR branch swapping on these 75 trees resulted in 99999 total MPTs. 99999 trees is the memory limit in the utilized version of TNT, so it is likely that several other MPTs are left unrecovered, which is always the reality under a heuristic search. To further check the results, therefore, several additional searches using identical protocols were run, as was a different type of heuristic search using the protocol outlined in Turner et al. (2012) [S9], in which 1000 replicates of Wagner trees are followed by TBR branch swapping. All of these analyses returned an identical strict consensus of recovered MPTs, suggesting that this consensus topology is more-or-less representative of the full range of most parsimonious trees.

**Tree Summary:** The 99999 individual most parsimonious trees were combined into a strict consensus topology (Dryad Fig. S1). Portions of the strict consensus are highly resolved and the monophyly of several major coelurosaurian subgroups is corroborated (e.g., Tyrannosauroidea, Compsognathidae, Alvarezsauoidea, Therizinosauoidea, Troodontidae). The ingroup relationships of some of these clades are also well resolved. However, several portions of this consensus phylogeny are unresolved. Perhaps surprisingly, Ornithomimosauria is not found to be monophyletic and there is a large polytomy at the base of the clade that includes all coelurosaurs more derived (closer to avialans) than tyrannosauroids. This lack of resolution is due to the uncertain phylogenetic position of a small handful of taxa, including the fragmentary basal coelurosaur *Kinnareemimus* (a purported ornithomimosaur: [S49]), the aberrant coelurosaur *Epidendrosaurus* (which is known only from two juvenile individuals: [S50]), the paravians *Pyroraptor* and *Hesperonychus*, and the avialan *Limenavis*. *Pyroraptor* and *Limenavis* were also found to be unstable in the analysis of Turner et al. (2012) [S9], whereas *Epidendrosaurus* was excluded from the primary version of that analysis. The “wildcard” nature of

these five taxa is largely due to enormous amounts of missing data—each taxon can only be scored for a small fraction of the 853 characters in the analysis.

In order to ameliorate the effects of these fragmentary wildcard taxa, a reduced strict consensus topology was created based on the 99999 most parsimonious trees. This procedure uses the original MPTs as source trees but simply excludes these five taxa when calculating the strict consensus. This is preferred to excluding these taxa from the analysis a priori, as it allows the taxa (and their character scores) to contribute information to the analysis and prevents the somewhat subjective decision of discarding taxa that seem too fragmentary from the outset. The reduced strict consensus topology is shown in Figures S1-S2 (and Dryad Figs. S2-S3) and is used here as the preferred phylogeny and basis for character optimization and discussion of coelurosaurian phylogeny and evolution. This topology is considerably more resolved than the strict consensus, and recovers a monophyletic Ornithomimosauria and better resolution among basal coelurosaurs and paravians.

**Clade Support Values:** The degree of support for individual clades was assessed in two ways. First, Bremer support values were calculated. These values, sometimes referred to as decay indices, denote the number of extra steps required for the clade to fall apart in the strict consensus of less optimal topologies. In the current case, a Bremer support value of 1 indicates that the clade in question is not recovered in the strict consensus of all trees of length 3361 or less (i.e., one step longer than the MPT length of 3360). Second, jackknife percentages were calculated. The jackknife is a resampling technique, in which the phylogeny is systematically reanalyzed as characters are randomly deleted. The jackknife percentage of each clade indicates the percent of trees recovered in the jackknife analysis that includes the clade in question. Both Bremer supports and jackknife percentages (absolute values) were calculated in TNT using standard scripts. The jackknife was run using the default parameter of 36% character removal probability and 1000 replicates.

**Salient Phylogenetic Results:** All of the major coelurosaurian subgroups that have long been considered monophyletic are also found to be monophyletic here. These include Tyrannosauroidae, Compsognathidae, Ornithomimosauria, Alvarezsauroidae, Therizinosauroidae, Oviraptorosauria, Dromaeosauridae, Troodontidae, and Avialae. Relationships within these clades are relatively well resolved in most cases. The exceptions include: Compsognathidae, whose ingroup relationships are completely unresolved; Ornithomimosauria, in which several intermediate taxa such as *Harpymimus* and *Garudimimus* fall into a polytomy; and Therizinosauroidae, in which the basal relationships are well resolved but numerous more derived taxa fall into a polytomy. Corroborating recent studies, *Haplocheirus* is found to be the basal-most alvarezsauroid [S18], *Nqwebasaurus* is recovered as a basal ornithomimosaur [S20], *Xiaotingia* and *Anchiornis* are recovered as basal troodontids [S9], *Mahakala* is a basal dromaeosaurid [S8-S9], and *Archaeopteryx* is the basal-most avialan (as traditionally found, contra [S21]). These results indicate that the phylogenetic positions of these taxa are robust to the inclusion of a large amount of new data relevant to “basal” coelurosaurs.

Among basal coelurosaurs, *Bicentenaria* is found to be the basal-most coelurosaurian taxon. Its position at the base of the clade is well supported: the clade of all other coelurosaurs is recovered in 65% of jackknife replicates and has a Bremer support value of 2. This is largely concordant with the phylogenetic analysis of [S51], which recovered *Tugulusaurus* as the most basal coelurosaur, followed by *Bicentenaria*. Here, *Tugulusaurus* and *Zuolong* are recovered in a slightly more derived position (i.e., they are more closely related to avialans than is *Bicentenaria*). *Tugulusaurus* and *Zuolong* comprise a polytomy with two other groups: Tyrannosauroidae and the clade of all other coelurosaurs.

The small-bodied basal coelurosaurs *Guanlong*, *Dilong*, and *Proceratosaurus* are members of the clade Tyrannosauroidae, defined as all taxa more closely related to *Tyrannosaurus* than to *Ornithomimus*, *Velociraptor*, and *Troodon* [S52]. This corroborates previous arguments in favor of the tyrannosauroid affinities of these taxa, which were largely based on shared, derived characters but

were often not tested with large-scale phylogenetic analyses that included a broad array of basal coelurosaurs (e.g., [S27, S53-S54]). More recent analyses with increased basal coelurosaur taxon and character sampling have found some or all of *Guanlong*, *Dilong*, and *Proceratosaurus* to group with tyrannosauroids [e.g. S12-14, S16, S18-19, S31, S55-56], but the Turner et al. (2012) phylogeny [S9] found *Dilong* and *Proceratosaurus* to be closer to avialans than to taxa such as *Eotyrannus* and *Tyrannosaurus*, and therefore not part of the tyrannosauroid clade. Here, the clade consisting of *Guanlong*, *Dilong*, *Proceratosaurus*, and traditionally recognized tyrannosauroids is strongly supported by a jackknife percentage of 82% and a Bremer support of 2.

Furthermore, *Coelurus* and *Tanycolagreus* form a sister taxon pair at the base of the tyrannosauroid lineage. This result was also recovered by [S12-14, S31, S51], whereas *Coelurus* occupies a range of other positions in other phylogenetic analyses (see below). *Tanycolagreus* has been included in only a few phylogenetic analyses; it groups with *Coelurus* as a basal tyrannosauroid in the studies of [S12-14, S51] but is placed elsewhere in other studies [S18, S55-S56] (see below). In the current analysis the sister taxon grouping of *Coelurus* and *Tanycolagreus* is well supported, as it is characterized by a jackknife percentage of 74% and a Bremer support of 2. The tyrannosauroid placement of these two genera is less supported, however, as the clade Tyrannosauroidea (*Coelurus*, *Tanycolagreus*, and all other tyrannosauroids) is characterized by a jackknife percentage of less than 50% and a Bremer value of 2).

Relationships within Tyrannosauroidea are well resolved and largely follow those reported by Brusatte et al. [S27] in their tyrannosauroid-specific phylogenetic analysis. This is not surprising considering that the Brusatte et al. [S27] character set has been integrated into the present analysis. The current study, however, reports slightly less resolution than the Brusatte et al. analysis [S27], which had recovered a single most parsimonious tree. Here *Proceratosaurus*, *Sinotyrannus*, and *Guanlong* fall into a polytomy within Proceratosauridae. Furthermore, Proceratosauridae, *Dilong*, and the *Eotyrannus* + Tyrannosauridae clade also fall into a polytomy, and *Eotyrannus* and *Juratyran* are in a polytomy at the base of the *Eotyrannus* + Tyrannosauridae clade. Many tyrannosauroid ingroup clades are well supported by high jackknife and Bremer support values.

All other coelurosaurs form a clade exclusive of *Bicentenaria*, *Tugulusaurus*, *Zuolong*, and tyrannosauroids. This clade—Maniraptoriformes—is only poorly supported (Bremer support of 1 and jackknife percentage of less than 50%), and relationships at its base are unresolved. There is a basal polytomy consisting of four clades: *Ornitholestes*, Compsognathidae, Ornithomimosauria, and Maniraptora (i.e., the clade of all taxa more closely related to birds than to *Ornithomimus*: [S52]). Maniraptora—the clade defined as all taxa closer to birds than to *Ornithomimus*—is comprised in the present study of Alvarezsauroidea, Therizinosauroidea, Oviraptorosauria, and Paraves. This clade is supported by a Bremer value of 2 but a jackknife percentage of less than 50%. The clade consisting of Oviraptorosauria and Paraves is supported by a Bremer value of 1 and a jackknife percentage of less than 50%. Paraves—consisting of dromaeosaurids, troodontids, and avialans—is also poorly supported, as it also has a Bremer value of 1 and a jackknife of less than 50%. The recently-described *Aurornis* and *Eosinopteryx* form a clade with *Anchiornis* and *Xiaotingia*, which is placed as an early-diverging group of troodontids. These relationships are supported by moderate Bremer values of 2 (for the troodontid placement of the *Anchiornis* clade and for the *Anchiornis* clade itself). The latter three of these taxa were recovered as troodontids by [S57], whereas *Aurornis*, *Anchiornis*, and *Xiaotingia* were recovered as basal avialans by [S58].

One intriguing result of the present analysis is that *Epidexipteryx* and *Pedopenna*, which together comprise a sister taxon group usually referred to as Scansoriopterygidae, are placed as the basal-most lineage of oviraptorosaurs. This result occurs in the reduced strict consensus after *Epidendrosaurus*, which is also usually placed in Scansoriopterygidae, is excluded a posteriori because of its status as a wildcard taxon. Scansoriopterygids are usually considered very basal avialans, possibly the basal-most members of the group (i.e., more basal than *Archaeopteryx*). This result is

recovered, for example, by [S12-S15, S18, S20-21, S51]. Turner et al. [S9] reported a different result in which *Epidexipteryx* is placed as the immediate outgroup of the clade consisting of dromaeosaurids, troodontids, and paravians, but also discussed how a grouping of *Epidexipteryx* and oviraptorosaurs is only slightly less parsimonious. In the present analysis, characters supporting the scansoriopterygid + oviraptorosaur grouping largely relate to features of the short and deep skull shared by both clades. It must be stated, however, that the scansoriopterygid + oviraptorosaur clade is poorly supported (Bremer support of 1, jackknife percentage of less than 50%).

**The Status of *Juravenator*:** As mentioned above, *Juravenator* was retained in the phylogenetic analysis even though its holotype and only known specimen is a very young individual. To assess any possible bias this may cause, *Juravenator* was excluded from the strict consensus tree construction a posteriori. Other than the omission of *Juravenator*, the resulting reduced strict consensus is identical to the reduced strict consensus that includes *Juravenator*. This exercise indicates that the phylogeny of Coelurosauria is robust to the inclusion or exclusion of *Juravenator* and that the monophyly and placement of Compsognathidae are not dependent on the inclusion of *Juravenator*.

**The Status of *Jixiangornis*:** The avialan taxon *Jixiangornis* may be a junior synonym of *Jeholornis*, another avialan included in our dataset. We retain both *Jixiangornis* and *Jeholornis* in the primary version of our dataset, following the protocol of previous TWiG analyses, and because our analysis does not find them as sister taxa (which may argue against their synonymy). However, when *Jixiangornis* is removed from the analysis 99999 most parsimonious trees of 3338 steps are recovered (CI=0.324, RI=0.779). The strict consensus with the five wildcards removed is nearly identical to the strict consensus of the primary analysis, with just two minor discrepancies: *Sapeornis* and *Jeholornis* now fall into a polytomy at the base of the clade of avialans more derived than *Archaeopteryx* (rather than as successive outgroups at the base of this clade in the primary analysis) and *Apsaravis* falls into a polytomy with *Yanornis*, *Yixianornis*, *Songlingornis*, and the clade of derived avialans including *Ichthyornis* and extant birds (rather than the immediate outgroup of the *Ichthyornis* + extant bird clade in the primary analysis).

**Clades and Synapomorphies:** In this section the synapomorphies uniting major coelurosaurian clades are listed. The focus here is on “basal” coelurosaurian clades (those taxa outside of Oviraptorosauria + Paraves), as the new data in this analysis focuses on these taxa. For these taxa, full diagnoses are presented for each clade in the strict reduced consensus topology. A full diagnosis is not presented for clades within Oviraptorosauria + Paraves, as the diagnoses of these clades are very similar to those presented and described in detail by the precursor analysis to this dataset [S9]. However, the major groups among Oviraptorosauria + Paraves, as well as particularly interesting or novel groups, are diagnosed below. All synapomorphies listed here are unambiguous synapomorphies of the clade in question, as optimized onto the reduced strict consensus tree in TNT. In this section character numbers are followed by a period and then the synapomorphic character state number.

**Coelurosauria:** 35.0; 194.1; 543.0; 846.1

**Clade of Coelurosauria other than *Bicentenaria*:** 99.0; 176.1; 675.0; 715.0

**Tyrannosauroidae:** 75.1; 256.1; 664.1; 839.1; 842.1

**Coeluridae (*Coelurus* + *Tanycolagreus*):** 142.1; 684.1; 836.1; 841.1; 842.2; 843.2; 844.1

**Clade of Tyrannosauroidae other than Coeluridae:** 24.1; 76.2; 481.1; 485.1,2; 514.3; 683.1; 702.1; 711.1; 712.1; 745.1; 790.1; 838.1; 846.0

**Proceratosauridae:** 270.1; 483.1; 484.1

***Proceratosaurus* + *Guanlong* + *Sinotyrannus*:** 498.1; 631.0; 635.0

**Clade of Tyrannosauroida other than Coeluridae, Proceratosauridae, and *Dilong***: 23.0; 72.1; 89.2; 169.1; 262.1; 263.1; 296.0; 501.1; 507.1; 514.1; 631.2; 632.1; 648.2; 668.1; 673.1; 684.1; 686.1; 694.1; 705.1; 714.1; 715.1; 751.1; 773.0; 784.0

**Clade of *Xiongguanlong* + *Tyrannosaurus***: 24.2; 30.0; 154.1; 155.2; 496.1; 566.1; 662.1; 664.0; 695.1; 696.1; 715.2

**Clade of *Dryptosaurus* + *Tyrannosaurus***: 182.1; 185.0; 851.0

**Clade of *Appalachiosaurus* + *Tyrannosaurus***: 719.1

**Clade of *Bistahieversor* + *Tyrannosaurus***: 235.2; 596.1; 597.1; 598.1; 600.1; 642.2; 726.1; 730.1

**Tyrannosauridae (*Albertosaurus* + *Tyrannosaurus*)**: 491.1; 515.1; 538.1; 588.1; 728.2

**Albertosaurinae (*Albertosaurus* + *Gorgosaurus*)**: 533.0; 534.1; 542.1; 548.1; 549.1; 570.1; 592.1; 614.1; 651.1

**Tyrannosaurinae (*Alioramus* + *Tyrannosaurus*)**: 482.2; 497.1; 522.1; 529.1; 554.1; 555.1; 560.2; 586.1; 589.1; 590.1; 618.1; 675.1; 828.1

**Clade of Tyrannosaurinae other than *Alioramus***: 91.1; 518.0; 562.2; 573.1; 577.1; 578.2

**Clade of Tyrannosaurinae other than *Alioramus* and *Teratophoneus***: 28.0; 234.0; 488.2; 517.1; 519.1; 524.1; 535.1; 553.1; 557.2; 579.2; 606.1; 651.1

***Tyrannosaurus* + *Tarbosaurus***: 3.2; 9.1; 10.1; 242.2; 256.2; 476.1; 490.0; 514.0; 537.1; 541.1; 543.1; 576.2; 579.3; 580.0; 587.1; 591.1; 602.1; 603.1; 612.0; 626.1; 627.1; 628.2; 635.2; 645.1; 646.1; 651.2; 653.1; 654.1; 659.1

**Maniraptoriformes (clade of Coelurosauria other than Tyrannosauroida and basal taxa)**: 19.0; 30.0; 60.1; 81.2; 97.1; 110.1; 117.1; 159.1; 235.0; 247.0; 252.0; 258.0; 275.1; 443.0; 460.0; 529.0; 605.0; 613.0; 631.0; 663.1; 691.1; 701.0; 740.1; 756.0; 780.1; 829.1; 846.0

**Compsognathidae**: 76.1; 81.1; 89.0; 94.1; 122.2; 174.1; 175.2; 206.1; 207.1; 452.0; 478.1; 479.1; 498.1; 551.1; 571.1; 622.2; 670.0; 682.1

**Ornithomimosauria**: 20.2; 25.2; 28.0; 132.1; 134.2; 146.1; 148.1; 190.1; 209.1; 386.0; 475.1; 684.1; 739.1; 754.2; 768.1; 778.1; 848.1

**Clade of Ornithomimosauria other than *Nqwebasaurus***: 211.1; 263.1; 767.1; 786.1

**Clade of Ornithomimosauria other than *Nqwebasaurus* and *Pelecanimimus***: 78.1; 80.1; 212.1; 217.1

***Beishanlong* + *Ornithomimus***: 108.1; 151.1; 164.1; 501.1; 624.1; 700.1; 731.1

**Ornithomimidae**: 31.1; 50.1; 72.1; 92.1; 133.1; 146.2; 200.2; 210.1; 214.1; 252.1; 260.0; 397.2; 442.1; 561.1; 563.1; 609.1; 610.1; 668.1; 689.1; 723.1; 742.1; 836.1

***Gallimimus* + *Anserimimus***: 736.1; 737.1

***Ornithomimus* + *Struthiomimus* + *Qiupalong***: 208.1; 285.1; 731.0; 734.1; 741.1; 744.1; 745.1

**Maniraptora (clade of Coelurosauria other than Tyrannosauroida, Ornithomimosauria, Compsognathidae, *Ornitholestes*, basal taxa)**: 4.1; 20.1; 41.1; 46.1; 86.1; 89.0; 115.1; 118.2; 143.1; 145.0; 156.1; 158.0; 161.1; 171.1; 185.0; 186.0; 214.1; 280.1; 464.1; 552.2; 680.1; 751.1; 763.1; 780.2; 840.1

**Alvarezsauroida**: 18.2; 21.1; 39.2; 66.1; 71.1; 75.1; 93.1; 101.1; 104.0; 134.2; 140.2; 141.1; 149.1; 207.1; 208.1; 222.1; 351.1; 406.1; 527.1; 678.1; 682.1; 757.1; 767.1; 826.1; 834.1

**Clade of Alvarezsauroida other than *Haplocheirus***: 154.1; 161.2; 181.1; 758.1

**Clade of Alvarezsauroida other than *Haplocheirus* and *Achillesaurus***: 195.1

**Clade of Alvarezsauroida other than *Haplocheirus*, *Achillesaurus*, and *Alvarezsaurus***: 99.1; 195.2; 697.1; 722.1; 838.1

***Ceratonykus* + *Parvicursor***: 102.0; 178.3; 181.2; 184.1; 187.1; 188.1; 189.1; 191.1; 192.1; 193.2; 200.3; 345.1; 407.1; 666.1; 669.0; 746.1; 755.1; 763.0; 764.1; 770.1

***Bonapartenykus* + *Patagonykus***: 161.1; 761.1

**Parvicursorinae (*Parvicursor* + *Mononykus*)**: 138.3; 337.1; 720.1; 776.0

***Shuvuuia* + *Linhenykus* + *Parvicursor***: 104.1; 778.0



*Linhenykus* + *Parvicursor*: 187.0

**Therizinosauroidae**: 8.1; 13.1; 63.1; 68.0; 81.0; 90.1; 98.1; 111.2; 117.0; 193.1; 348.1; 352.1; 366.1; 505.1; 610.1; 683.1; 745.1; 754.1; 775.1; 788.1; 789.1; 796.1; 798.1; 802.1; 815.1; 824.0; 842.1; 846.2

**All Therizinosauroidae other than *Falcarius***: 64.1; 67.1; 84.0; 85.1; 165.2; 212.1; 462.1; 701.1; 804.1; 806.1; 813.1; 817.1; 823.1; 849.1

**All Therizinosauroidae other than *Falcarius* and *Beipiaosaurus***: 151.2; 154.1; 167.1; 182.1; 203.1; 629.2; 711.2; 799.1; 805.1; 807.1

**All Therizinosauroidae other than *Falcarius*, *Beipiaosaurus*, and *Alxasaurus***: 740.0; 797.1; 800.1; 801.1

**All Therizinosauroidae other than *Falcarius*, *Beipiaosaurus*, *Alxasaurus*, and *Erliaosaurus***: 133.1; 185.1; 713.1; 763.2; 805.2; 811.1; 818.2

**Oviraptorosauria (including Scansoriopterygidae)**: 64.1; 68.0; 113.1; 217.1; 248.2; 623.2; 629.2

**Dromaeosauridae**: 17.1; 54.0; 56.1; 86.1; 101.1; 198.1; 201.1; 447.1; 607.1; 753.1

**Troodontidae (including *Anchiornis* clade)**: 21.1; 50.1; 68.0; 69.1; 87.1; 200.1/2; 348.1; 491.1; 498.1

***Anchiornis* + *Aurornis* + *Eosinopteryx* + *Xiaotingia***: 51.1; 160.1; 206.1; 231.1; 241.1; 246.0; 503.1; 629.1; 752.1

**Avialae (*Archaeopteryx* node)**: 1.1; 18.2; 46.0; 114.2; 119.3/4; 152.1; 202.3; 233.1; 240.1; 262.3; 278.1; 279.1; 312.0; 421.1; 434.0; 444.1; 610.1

## 2) Rates of Morphological Evolution

**Methods:** In order to test for unusually high or low rates of morphological evolution we adopted the two likelihood tests presented in Lloyd et al. [S59]. The first of these asks whether an individual branch has a significantly higher or lower rate of evolution than the rest of the tree. The second asks whether a particular clade has a significantly higher or lower rate of evolution than the rest of the tree. In both cases rates are measured using discrete morphological characters, which are listed in our Dryad Supplementary Appendices 1 and 2. All analyses were conducted in R by GTL and all code and data used are made available in our Dryad Dataset. Only Mesozoic coelurosaurs were included in these analyses; the six post-Mesozoic avialan exemplars in the phylogenetic dataset were excluded, as they are only a small sample of post-Mesozoic avialan diversity. Our analyses essentially take the K-Pg boundary as a time horizon and test differences in rates between coelurosaurs living before this time.

Originally the Lloyd et al. [S59] tests required three items of data: 1) a tree with branches scaled to the number of character changes, 2) a set of numeric ages (in millions of years) for each taxon present in the tree, and 3) a vector indicating the number of missing characters for each taxon present in the tree. This last piece of information was used to correct for the number of changes it is possible to observe along terminal branches. That incompleteness only affected terminal branches was due to the fact that ancestral states for each discrete character were inferred using parsimony algorithms (ACCTRAN or DELTRAN). Such algorithms do not adequately account for uncertainty, nor do they use branch durations in their inferences. Furthermore, they can lead to clumps of character changes at nodes that precede, or follow, stretches of taxa with large amounts of missing data. Consequently here we adopt the core of the Lloyd et al. [S59] approach, but make some modifications to the input data.

This new approach begins by time-scaling the tree *before* inferring the ancestral states, and by extension the number of character changes. Consequently the Ruta et al. [S60] method used in Lloyd et al. [S59] could not be employed here (as it time-scales a tree in part using the number of character changes on each branch to infer temporal branch lengths), and instead the “equal” approach of Brusatte et al. [S61] as implemented in the R package paleotree [S62]. After time-scaling each tree, ancestral character states were estimated using the likelihood-based rerooting method function in the R package phytools [S63]. As the algorithm can only make estimates where data is available, taxa that could not

be a coded for a character were dropped from the tree, and any nodes that were consequently removed were scored as question marks (missing data). For nodes that remain the most likely state was recorded, or if more than one state were equally likely then each equally likely state was recorded in a polymorphism. Once all characters had been estimated in this way the total number of changes along each branch could be recorded. This was done by first checking whether the character state was recorded at *both* ends of each branch. Then if the states were the same no changes were recorded, and if different either one change (if character was treated as unordered) was recorded, or if ordered the absolute difference between the states was used. If one or more states were polymorphic the closest state was used and the number of changes recorded accordingly. Similarly the number of states recorded at both ends of the branch was used to create the percentage completeness metric used in the Lloyd et al. algorithms [S59]. After these steps were completed the data were passed to the two Lloyd et al. [S59] tests and the number of branches and clades that showed significantly high (red), non-significant (white), or significantly low (blue) rates were recorded. As in Lloyd et al. [S59] an alpha of 0.01 was used to assess significance.

Multiple replicates are necessary for each analysis, because uncertainty in branch durations affects both how likelihood optimizes character changes and how rates (change over time) for each branch are later calculated. Uncertainties in branch durations occur because our branch-scaling methods rely on the ages of the terminal taxa (Dryad Supplementary Appendix 3), which are rarely dated to a specific age (e.g., “95 million years ago”) but almost always to a broad range of age uncertainty (e.g., “Aptian-Albian,” which would correspond to somewhere within the time range of 126-120 million years ago). To take into account this uncertainty, we drew the ages of each taxon from uniform distributions bounded by their first and last possible appearance dates. This uncertainty was visualised by using pie charts at each branch or node (depending on the test), which depict the relative proportion of replicates indicating high, low, or non-significant rates. In the original Lloyd et al. [S59] study, 1,000 replicates were used for each analysis. However, due to the addition of the extra steps we now use here (outlined above), and the large number of characters involved, individual replicates took longer than those in the Lloyd et al. [S59] study. Consequently producing 1,000 replicates for a single topology was not considered tenable here, so fewer numbers of replicates (either 25 or 100) were used for each analysis.

For our primary analysis, we randomly selected a single most parsimonious tree (MPT) and applied the modified Lloyd et al. [S59] methods to test which branches and clades had significantly high or low rates of change. For this analysis we used 100 replicates. We followed this with a number of sensitivity tests to gauge how robust the recovered patterns were. The first of these involved randomly selecting nine other MPTs, to assess how differences in tree topology affect the rate results. For these sensitivity analyses 25 replicates were used for each of the nine trees.

The second sensitivity test examined the effects of different time-scaling algorithms. Our primary analysis and the analysis on the nine additional MPTs used the “equal” time-scaling method of Brusatte et al. [S61]. Our sensitivity test used a different time-scaling option, the minimum-branch length method (the “mbl” option in paleotree; [S62]), and repeated the branch and node rate tests on the first sampled MPT using 100 randomized dating replicates and a “vartime” value of 1 million years.

A third sensitivity analysis tested for rate heterogeneity on a tree where branches were scaled to unit length, in order to gauge how much of the rate results could be explained just by the amount of character change alone (not branch duration). Again 100 dating replicates were used. Note that this is merely a sensitivity test to assess the influence of character changes (not time) in the rate calculations. We are not performing this exercise as a primary analysis in which we assume a speciation model of evolution to measure morphological rates (such a model, where evolution happens only at speciation events, is expected to generate a tree where all branches are equal, and thus unrelated to time, but is

inappropriate for our dataset because it assumes that all species have been sampled or that sampling has been uniform across the clade being studied [S64]).

Fourth, the effect of the number of sampled taxa in each major clade (specifically: Alvarezsauroidea, Avialae, Comspognathidae, Dromaeosauridae, Ornithomimosauria, Oviraptorosauria, Therizinosauria, Troodontidae, and Tyrannosauroidae) was tested by randomly removing taxa from each clade until each one was the same size (set at six species, based on the smallest clade, the Comspognathids). This process was repeated 1,000 times (more replicates were possible as the trees were considerably smaller), using one of the ten sampled trees chosen at random and randomly sampled dates. In each case the number of significantly high, low, or non-significant branches in each clade was recorded, as was the result of the clade test. This addresses the “node-density” effect [S65].

Finally, a potential bias in rate between terminal and internal branches (e.g., due to the lack of sampled autapomorphies) was tested by separating the two branch-types and repeating both tests. Thus, the branches test was conducted by comparing each internal branch to all other internal branches only, and each terminal branch against all other terminal branches only. Similarly the clade test was repeated by considering either only internal or only terminal branches. For both of these tests 25 dating replicates were used across each of the ten sampled trees.

**Results:** The initial results of the branch (Dryad Fig. S4-13) and clade (Fig. S3; Dryad Fig. S14-23) tests strongly support significantly high rates in Avialae, and to a lesser degree Tyrannosauroidae. Other clades show significantly low or non-significant rates, with the exception of two smaller clades: *Graciliraptor + Microraptor + Shanag + Sinornithosaurus + Tianyuraptor* (within Dromaeosauridae), and *Anchiornis + Aurornis + Eosinopteryx + Xiaotingia* (within Troodontidae), which frequently show high rates. Application of a different dating algorithm (Dryad Fig. S24-25) does not appreciably change these results, suggesting that the results are not due to the (potentially arbitrary) choice of dating algorithm.

The use of a unit branch length (Dryad Fig. S26-27) also does not appreciably change the results. This suggests that it is not possible to discount the hypothesis that high rates in Avialae and Tyrannosauroidae are due solely to character over-splitting. This is indeed likely in the case of Tyrannosauroidae, as 200+ characters relevant to tyrannosauroid phylogeny were incorporated into the TWiG dataset for the first time in this study (and because the high tyrannosauroid rates disappear in some other sensitivity analyses, see below). We find it to be less likely for Mesozoic avialans, because these taxa were incorporated into previous TWiG datasets alongside other paravians (dromaeosaurids and troodontids), so it is not clear that any Mesozoic paravian group has been rampantly over-studied relative to any other. Indeed, all paravians have been the subject of intense historical study because of the close proximity of troodontids and dromaeosaurids to birds, yet these other paravian groups do not exhibit high rates. Ultimately, however, “ascertainment biases” that come with how researchers select characters can never be entirely dismissed, but it is important to point out that these same biases also affect many other types of data and analyses, such as phylogenetic analyses based on morphological data, geometric morphometric analyses based on the selection of landmarks and specimens, and even molecular phylogenetic and macroevolutionary analyses that require researchers to choose taxa and samples for analysis. The fact that our other sensitivity analyses consistently find high rates in birds (but not tyrannosauroids), as outlined below, gives us added confidence that the high rates in Mesozoic avialans are genuine. In addition, other recent studies using body size and limb measurement data also find high rates close to the origin of birds, lending additional confidence.

Subsampling the data to give clades of equal size does dramatically reduce the number of significant branches and clades (Dryad Fig. S28). However, Avialae remains the clade with the most significantly fast branches, and the most frequent clade to exhibit high rates. Tyrannosauroidae, on the other hand, exhibits the most significantly slow branches and is the clade that shows the second most

frequent cases of significantly slow rates (and has no significantly fast outcomes). Thus, the number of avian taxa appears to only have a minimal effect on the high rates found in the full tree. In contrast, the large number of tyrannosauroid taxa (caused by the addition of numerous taxa into the TWiG matrix for the first time here) seems to be the major contributing factor in the high rates found in the full tree.

Repeating the branches test, but splitting out terminal and internal branches into separate categories, does appreciably reduce the number of significant results (Dryad Fig. S29-38). This suggests that there is an important distinction between terminal and internal branches. However, rather than there being fewer changes along terminal branches (an expectation due to the lack of autapomorphic characters recorded), it is the shorter duration of internal branches that leads to them exhibiting higher rates. Importantly, though, the general distribution of slow and fast rates is consistent with the results obtained when no distinction is drawn between terminal and internal branches. When the clade test is repeated and either only internal (Dryad Fig. S39-48) or only terminal (Dryad Fig. S49-58) branches are considered, once again there is a reduction in the overall number of significant results. (Exclusion of the disputed taxon *Jixiangornis* also has little effect; Dryad Fig. S59-63). However, Avialae remains a consistently high rate clade across all trees and regardless of whether only terminal or internal branches are considered (Dryad Fig. S64-68). Tyrannosauroidea, on the other hand, maintains a frequently high rate result for internal branches, but a non-significant outcome is much more frequent when only terminal branches are considered. Overall, these results suggest it is worthwhile treating terminal and internal branches separately in rate analyses.

In summary, the high rates of change found in Avialae survive every sensitivity test, and are only notably diminished (but not eliminated) by subsampling. In contrast, the high rates in Tyrannosauroidea, found in the primary analyses using the full tree (Dryad Fig. S69-168), are more weakly supported and are diminished or eliminated in many of the sensitivity tests. As a result, we consider the high rates in Avialae to be a robust result, but the high rates in Tyrannosauroidea to most likely be caused by a combination of the large number of tyrannosauroid taxa and the large number of characters relevant to them.

### 3) Morphospace Occupation

In order to test the morphological distinctness of birds relative to other theropods, we plotted all theropods in our dataset into a multivariate morphospace [S66]. A morphospace is a representation of the spread of anatomical form in a group (in this case coelurosaurian theropods). Each axis of the morphospace corresponds to a variable that describes some aspect of morphological form and each point in the morphospace represents a taxon in the dataset. Because the morphological data we used to construct the morphospace is our 853-character discrete character dataset, the morphospace is more properly described as a morphological character space. This morphospace is non-phylogenetic (phenetic) in nature; in other words, taxa are plotted on axes based on their overall morphological form, without phylogeny being taken into account. Additionally, a morphospace only denotes the total spread of morphological variation in a set of taxa, without any indication of the speed at which this variation accumulates (which would be an evolutionary rate). In both of these ways, our morphospace occupation calculations are distinct from our evolutionary rate calculations. A similar exercise was conducted by [S13], but with a smaller character dataset, and without any statistical analyses to test for significant, quantitative differences between groups.

To construct our morphospace, we first derived a Euclidean distance matrix from our discrete character dataset using the freeware program MATRIX [S67]. The Euclidean matrix quantifies the pairwise differences in character scores between all theropods in the dataset. We then subjected this distance matrix to principal coordinates analysis (PCO, also known as multidimensional scaling), a multivariate ordination technique that summarizes information from the distance matrix in a smaller and more manageable set of coordinate axes. We used the software GINKGO (Universitat de

Barcelona, <http://biodiver.bio.ub.es/ginkgo/>) to perform the PCO, using the Calliez negative eigenvalue correction. We then verified that the results were consistent with those produced by the software R (<http://www.r-project.org>). Each axis returned by the PCO represents an aspect of morphology (or multiple aspects) distilled from the larger character dataset. The first axis represents those character distances contributing most to the overall variability among theropods, and each additional axis represents distances of progressively less significance. Each theropod has a score on each axis, which together represent aspects of the overall form (based on discrete character scores) for each taxon. The axes define the multivariate morphospace, and the set of scores for each theropod on these axes therefore represent the taxon's position in the morphospace.

The discrete character dataset used to build the morphospace was originally compiled to be used for our phylogenetic analysis. The use of phylogenetic discrete character datasets to construct morphospaces and study taxon distribution and disparity is a common practice in studies of fossil vertebrates [e.g. S61, S68-S79]. Although potentially biased by phylogenetic signal and loss of information due to binning into discrete states, cladistic characters describe a large amount of information from across the skeleton that is difficult to extract with other methods, such as linear or geometric morphometrics, which cannot easily convey the complexities of three-dimensional and often crushed and poorly preserved vertebrate skeletons [S80]. The use of cladistic characters is also ideal for this study, as we compiled a large amount of character data on coelurosaurs that provides a ready source of morphological data. One potential issue with cladistic datasets, including the dataset we use, is that they do not often include autapomorphies of the individual taxa. We decided against adding autapomorphies for two reasons. First, there is no available published source of autapomorphies for all theropods in our analysis. Second, because not all of the included taxa have been studied in equivalent detail, it is likely that adding autapomorphies will introduce a bias, in which theropods that have been better described or described more recently will likely have more autapomorphies listed, which would serve to artificially inflate the difference between those species and less-studied species, thus inflating the degree of morphospace separation. By contrast, a large amount of effort over the past few decades has focused on finding and scoring characters that are relevant to the phylogenetic relatedness of theropod species, rather than the distinctiveness of individual species, and such characters form our dataset.

The PCO analysis returned 145 axes. The first axis explained 1.57% of total variance, the second 1.48%, and the third 1.19%. Each subsequent axis explained progressively less total variation. To visualize the morphospace, we plotted axes 1 and 2 and axes 2 and 3 against each other (Fig. 3). A parallel coordinates plot of the first 30 PC axes is presented in Dryad Figure S169 and bivariate plots of the first 10 PC axes are presented in Dryad Figure S170. To test the “distinctiveness” of coelurosaur subgroups, however, we use the taxon scores on all axes that together comprise 90% of total variance, in this case 125 axes.

In order to test the “distinctiveness” of avialans relative to other theropods, we used three suites of tests.

Permutation Tests: We first used permutation tests to perform pairwise comparisons of group means. These comparisons tested the equality of multivariate means (based on the 125 PCO axes) of two designated groups (for example, avialans vs. deinonychosaurs). The Mahalanobis distance between the two group means was calculated and compared with a null distribution of between-group distances obtained by randomly permuting the group labels. All analyses were run in R 3.0.2 and PAST 2.17 [S81] with 2000 replications. All results are given in Tables S1-S2.

We ran two series of tests. In each series, the primary analysis is a comparison of Mesozoic avialans to other coelurosaurs. We hold that this is the most meaningful comparison, because it compares non-avialan dinosaurs with the Mesozoic avialans that lived alongside them, and because post-Mesozoic avialans are represented by only a handful of exemplars meant to help polarize characters in the phylogenetic analysis. However, for each series we also ran two sensitivity tests: one

comparing all avialans (the 22 Mesozoic taxa and six post-Mesozoic taxa) to other coelurosaur groups, and the second in which *Xiaotingia*, *Aurornis*, and *Anchiornis* (taxa which in our phylogeny are placed as troodontids, but which have been recovered as avialans by others) are included in the avialan sample.

First, we compared avialans vs. the total pool of all other theropods. In these tests, avialans are found to be significantly different than the pool of all non-avialans. This is true when Mesozoic avialans are analyzed, all avialans are analyzed, and *Xiaotingia*, *Aurornis*, and *Anchiornis* are included in Avialae. To put these findings into context, we also compared other coelurosaur subgroups (e.g., dromaeosaurids) vs. the total pool of species outside of that subgroup. Many, but not all, of these comparisons were also significantly different ( $p < 0.05$ ) or marginally significantly different ( $0.05 < p < 0.10$ ). Therefore, birds are not exceptional in being significantly different in their morphospace occupation patterns from all other theropods.

Second, we conducted pairwise comparisons of avialans and their very closest relatives: dromaeosaurids, troodontids, and deinonychosaurs as a whole (dromaeosaurids plus troodontids). These tests assess whether avialans have significantly different morphospace occupation patterns compared to their immediate sister taxa, which is perhaps a more appropriate test of whether birds are distinct from other theropods in overall morphological form. These tests used the same three groupings of avialans as above. The results showed no significant difference between avialans and deinonychosaurs or between avialans and dromaeosaurids, no matter which avialan groups were used (all, Mesozoic-only, or including the *Anchiornis* clade). The results also showed no significant difference between Mesozoic avialans and troodontids. Significant differences were found between all avialans and troodontids and between all avialans (including *Xiaotingia*, *Aurornis*, and *Anchiornis*) and troodontids. This indicates that these significant differences are driven by the inclusion of the six post-Mesozoic avialans, which have the most derived skeletons of all avialans in the dataset, and which lived tens of millions of years after troodontids. As argued above, however, we hold that the most meaningful comparison is between Mesozoic avialans and other coelurosaur groups.

To put these results into context, we also performed several pairwise comparisons between other major coelurosaur subgroups. Most of these comparisons were non-significant, but those between oviraptorosaurs and deinonychosaurs, ornithomimosaurs and tyrannosauroids, and oviraptorosaurs and therizinosauroids were significant. What this means is two-fold: 1) It is common for coelurosaur subgroups to be statistically indistinguishable from each other in morphospace, meaning that, for example, avialans and dromaeosaurids are not clearly more distinct from each other than are therizinosauroids and alvarezsauroids (as both sets of comparisons yield non-significant results). 2) But some coelurosaur subgroups are significantly distinct from each other, meaning that, for example, ornithomimosaurs and tyrannosauroids are more different from each other than are avialans and deinonychosaurs. Taken together, these results indicate that there is no clear evidence for the separation of avialans from other coelurosaurs, particularly their close relatives. They appear to be merely a 'conventional' group of coelurosaurs, just like therizinosauroids or dromaeosaurids.

Comparative Distance Tests: Second, to assess whether avialans differ from closely-related clades more or less so than other groups differ from their closely-related clades, we carried out three analyses.

In the first analysis, we compared the Euclidean distance from each of the 22 Mesozoic avialan species in our dataset to each of the 21 dromaeosaurid species in the dataset, for a total of 462 pairwise distances. We compared these distances to distances from each pair of members of the following closely related sets of clades: compsognathids and ornithomimosaurs, therizinosauroids and alvarezsauroids, troodontids and dromaeosaurids, ornithomimosaurs and alvarezsauroids, compsognathids and tyrannosauroids, ornithomimosaurs and tyrannosauroids, oviraptorosaurs and therizinosauroids, oviraptorosaurs and dromaeosaurids, oviraptorosaurs and troodontids, therizinosauroids and dromaeosaurids, therizinosauroids and troodontids, alvarezsauroids and

dromaeosaurids, and alvarezsauroids and troodontids. This comparison group consisted of distances between 2534 pairs of species. The distances between avialan/dromaeosaurid pairs of species averaged 484.4 units with an SD of 20.5, and the distances between the comparison pairs averaged 478.1 units with an SD of 20.8 (Dryad Fig. S171), with the two sets of distances having broadly similar left-skewed distributions. Due to the large sample sizes, the two groups were significantly different according to a two-sample t-test and a Mann-Whitney-Wilcoxon test (the large sample sizes give these tests a very high power to detect minor differences between two means or distributions, meaning that even very slight differences come out as statistically significant). However, the difference in means between the two groups (6.3 units, about 1.3% of the average of either group) was of so small to be of negligible practical importance.

In the second analysis, we compared the Euclidean distance from each of the 22 Mesozoic avialan species in our dataset to each of the 16 troodontid species in the dataset, for a total of 352 pairwise distances. We compared these distances to distances from the same set of 2534 pairs of species as in the first analysis. The distances between avialan/troodontid pairs of species averaged 482.1 with an SD of 22.5, and the distances between the comparison pairs (as noted previously) averaged 478.1 with an SD of 20.8 (Dryad Fig. S171), with the two sets of distances having broadly similar left-skewed distributions. Due to the large sample sizes, the two groups were significantly different according to a two-sample t-test and a Mann-Whitney-Wilcoxon test. However, the difference in means between the two groups (4.0 units, about 0.8% of the average of either group) was so small to be of negligible practical importance.

In the third analysis, we compared the Euclidean distance from each of the 22 Mesozoic avialan species in our dataset to each of the 37 deinonychosaur species in the dataset, for a total of 814 pairwise distances. We compared these distances to distances from each pair of members of the following clades: compsognathids and ornithomimosaurs, therizinosauroids and alvarezsauroids, ornithomimosaurs and alvarezsauroids, compsognathids and tyrannosauroids, ornithomimosaurs and tyrannosauroids, oviraptorosaurs and therizinosauroids, oviraptorosaurs and deinonychosaurs, alvarezsauroids and deinonychosaurs, and therizinosauroids and deinonychosaurs. This comparison group consisted of distances between 2198 pairs of species. The distances between avialan/deinonychosaur pairs of species averaged 483.4 with an SD of 21.4, and the distances between the comparison pairs averaged 478.0 with an SD of 20.9 (Dryad Fig. S172), with the two sets of distances having broadly similar left-skewed distributions. Due to the large sample sizes, the two groups were significantly different according to a two-sample t-test and a Mann-Whitney-Wilcoxon test. However, the difference in means between the two groups (5.4 units, about 1.1% of the average of either group) was so small to be of negligible practical importance.

In conclusion, it does not appear that the differences between avialans and their closely related clades were substantially unlike the differences between other pairs of closely-related coelurosaurian clades. Thus, in terms of their position in morphospace, birds do not appear to be an outlier compared to other coelurosaur groups.

Comparative Disparity: To test whether avialans occupied a larger volume of morphospace than other coelurosaurians, we calculated disparity metrics for Mesozoic avialans and other coelurosaurian clades (Deinonychosauria, Dromaeosauridae, Troodontidae, Oviraptorosauria, Therizinosauroidea, Alvarezsauroidea, Ornithomimosauria, Compsognathidae, Tyrannosauroidea). We calculated four metrics for each clade: the sum and product of the ranges and of the variance of the first 125 PCO axes [S66-S67]. The product metrics were normalized by taking the 125th root. Note that the sum metrics are proportional to the arithmetic mean, and the product metrics are equivalent to the geometric mean. Calculations were carried out using the software R, version 3.0.2.

For each of the clades and each of the four disparity metrics, we used a permutation test with 10,000 randomizations to test the null hypothesis of no difference between avialans and the clade being compared. Although some of these disparity metrics are sensitive to sample size, note that our

approach does not require equal sample sizes or rarefaction to equal sizes. Any bias due to unequal sample sizes is automatically accounted for in the distribution of randomized differences in our permutation tests. The disparity metrics for all clades are given in Table S3, and results from the permutation tests are given in Dryad Figures S173-181.

The most salient result is that there is no significant difference between the disparity of Mesozoic avialans and their closest relatives (dromaeosaurids, troodontids, and deinonychosaurs) based on all four disparity metrics. More broadly, there are only a handful of significant differences between Mesozoic avialans and any coelurosaur groups (sum of variances when compared with alvarezsauroids; product of ranges and product of variances when compared with compsognathids; sum of variances when compared with therizinosauroids). These tests therefore provide strong evidence that birds do not have greater morphological disparity (a larger morphospace occupation) than other coelurosaur groups, particularly their closest relatives.



## Supplemental References

- S1. Norell, M.A., Clark, J.M., and Makovicky, P.J. (2001). Relationships among Maniraptora: problems and prospects. In *New Perspectives on the Origin and Early Evolution of Birds*, J. Gauthier and L.F. Gall, eds. (New Haven, CT: Peabody Museum of Natural History), pp 49-67.
- S2. Norell, M.A., Clark, J.M., Turner, A.H., Makovicky, P.J., Barsbold, R., and Rowe, T. (2006). A new dromaeosaurid theropod from Ukhaa Tolgod (Ömnögovi, Mongolia). *Am. Mus. Novit.* 3545, 1–51.
- S3. Clark, J.M., Norell, M.A., and Makovicky, P.J. (2002). Cladistic approaches to the relationship of birds to other theropod dinosaurs. In *Mesozoic Birds: Above the Heads of Dinosaurs*, L.M. Chiappe and L.M. Witmer, eds. (Berkeley: University of California Press), pp 31-64.
- S4. Hwang, S.H., Norell, M.A., Ji, Q., and Gao, K.-Q. (2002). New specimens of *Microraptor zhaoianus* (Theropoda: Dromaeosauridae) from Northeastern China. *Am. Mus. Nov.* 3381, 1–44.
- S5. Hwang, S.H., Norell, M.A., Ji, Q., and Gao, K.-Q. (2004). A large compsognathid from the Early Cretaceous Yixian Formation of China. *J. Syst. Palaeontol.* 2, 13–30.
- S6. Makovicky, P.J., Norell, M.A., Clark, J.M., and Rowe, T. (2003). Osteology and relationships of *Byronosaurus jaffei* (Theropoda: Troodontidae). *Am. Mus. Nov.* 3402, 1-32.
- S7. Makovicky, P.J., Apesteguía, S., and Agnolín, F.L. (2005). The earliest dromaeosaurid theropod from South America. *Nature* 437, 1007–1011.
- S8. Turner, A.H., Pol, D., Clarke, J.A., Erickson, G.M., and Norell, M.A. (2007). A basal dromaeosaurid and size evolution preceding avian flight. *Science* 317, 1378–1381.
- S9. Turner, A.H., Makovicky, P.J. and Norell, M.A. (2012). A review of dromaeosaurid systematics and paravian phylogeny. *Bull. Am. Mus. Nat. Hist.* 371, 1-206.
- S10. Csiki, Z., Vremir, M., Brusatte, S.L., and Norell, M.A. (2010). An aberrant island-dwelling theropod dinosaur from the Late Cretaceous of Romania. *Proc. Nat. Acad. Sci. USA* 107, 15357-15361.
- S11. Clarke, J.A., Zhou, Z., and Zhang, F. (2006). Insight into the evolution of avian flight from a new clade of Early Cretaceous ornithurines from China and the morphology of *Yixianornis grabaui*. *J. Anat.* 208, 287-308.
- S12. Senter, P. (2007). A new look at the phylogeny of Coelurosauria (Dinosauria: Theropoda). *J. Syst. Palaeontol.* 5, 429-463.
- S13. Senter, P. (2010). Using creation science to demonstrate evolution: application of a creationist method for visualizing gaps in the fossil record to a phylogenetic study of coelurosaurian dinosaurs. *J. Evol. Biol.* 23, 1732-1743.
- S14. Senter, P. (2011). Using creation science to demonstrate evolution 2: morphological continuity within Dinosauria. *J. Evol. Biol.* 24, 2197-2216.

- S15. Zhang, F., Zhou, Z., Xu, X., Wang, X., and Sullivan, C. (2008). A bizarre Jurassic maniraptoran from China with elongate ribbon-like feathers. *Nature* 455, 1105-1108.
- S16. Zanno, L.E., Gillette, D.D., Albright, L.B., and Titus, A.L. (2009). A new North American therizinosaurid and the role of herbivory in 'predatory' dinosaur evolution. *Proc. R. Soc. Lon. B* 276, 3505-3511.
- S17. Zanno, L.E. (2010). A taxonomic and phylogenetic re-evaluation of Therizinosauria (Dinosauria: Maniraptora). *J. Syst. Palaeontol.* 8, 503-543.
- S18. Choiniere, J.N., Xu, X., Clark, J.M., Forster, C.A., Guo, Y., and Han, F. (2010). A basal alvarezsaurid theropod from the early Late Jurassic of Xinjiang, China. *Science* 327, 571-573.
- S19. Choiniere, J.N., Clark, J.M., Forster, C.A., and Xu, X. (2010). A basal coelurosaur (Dinosauria: Theropoda) from the Late Jurassic (Oxfordian) of the Shishugou Formation in Wucuiwan, People's Republic of China. *J. Vert. Paleontol.* 30, 1773-1796.
- S20. Choiniere, J.N., Forster, C.A., and de Klerk, W.J. (2012). New information on *Nqwebasaurus thwazi*, a coelurosaurian theropod from the Early Cretaceous Kirkwood Formation in South Africa. *J. Afr. Earth Sci.* 71-72, 1-17.
- S21. Xu, X., You, H., Du, K., and Han, F. (2011). An *Archaeopteryx*-like theropod from China and the origin of Avialae. *Nature* 475, 465-470.
- S22. Brusatte, S.L. (2013). The phylogeny of basal coelurosaurian theropods (Archosauria: Dinosauria) and patterns of morphological evolution during the dinosaur-bird transition. Ph.D. dissertation. Columbia University, New York.
- S23. Madsen, J.H. (1976). *Allosaurus fragilis*: a revised osteology. Utah Geological Survey Bulletin 109, 1-163.
- S24. Currie, P.J., and Zhao, X.-J. (1993). A new large theropod (Dinosauria, Theropoda) from the Jurassic of Xinjiang, People's Republic of China. *Can. J. Earth Sci.* 30, 2037-2081.
- S25. Norell, M.A., and Makovicky, P.J. (1997). Important features of the dromaeosaur skeleton: information from a new specimen. *Am. Mus. Nov.* 3215, 1-28.
- S26. Norell, M.A., and Makovicky, P.J. (1999). Important features of the dromaeosaur skeleton II: information from newly collected specimens of *Velociraptor mongoliensis*. *Am. Mus. Nov.* 3282, 1-45.
- S27. Brusatte, S.L. et al. (2010). Tyrannosaur paleobiology: new research on ancient exemplar organisms. *Science* 329, 1481-1485.
- S28. Makovicky, P.J., Kobayashi, Y., and Currie, P.J. (2004). Ornithomimosauria. In *The Dinosauria*, Second Edition, D.B. Weishampel, P. Dodson, and H. Osmólska, eds. (Berkeley: University of California Press), pp 137-150.

- S29. Nicholls, E.L., and Russell, A.P. (1985). Structure and function of the pectoral girdle and forelimb of *Struthiomimus altus* (Theropoda: Ornithomimidae). *Palaeontol.* 28, 638-677.
- S30. Dal Sasso, C., and Signore, M. (1998). Exceptional soft-tissue preservation in a theropod dinosaur from Italy. *Nature* 392, 383-387.
- S31. Dal Sasso, C., and Maganuco, S. (2011). *Scipionyx samniticus* (Theropoda: Compsognathidae) from the Lower Cretaceous of Italy. Osteology, ontogenetic assessment, phylogeny, soft tissue anatomy, taphonomy and palaeobiology. *Memorie della Società Italiana di Scienze Naturali e del Museo Civico di Storia di Milano XXXVII*, 1-281.
- S32. Sereno, P.C., Tan, L., Brusatte, S.L., Kriegstein, H.J., Zhao, X., and Cloward, K. (2009). Tyrannosaurid skeletal design first evolved at small body size. *Science* 326, 418-422.
- S33. Rauhut, O.W.M., and Xu, X. (2005). The small theropod dinosaurs *Tugulusaurus* and *Phaedrolosaurus* from the Early Cretaceous of Xinjiang, China. *J. Vert. Paleontol.* 25, 107-118.
- S34. Kellner, A.W.A. (1999). Short Note on a new dinosaur (Theropoda, Coelurosauria) from the Santana Formation (Romualdo Member, Albian), northeastern Brazil". *Boletim do Museu Nacional (Serie Geologia)* 49, 1-8.
- S35. Xu, X., and Wang, X. (2003). A new maniraptoran from the Early Cretaceous Yixian Formation of western Liaoning. *Vertebrata Palasiatica* 41, 195-202.
- S36. Dececchi, T.A., Larsson, H.C.E., and Hone, D.W.E. (2012). *Yixianosaurus longimanus* (Theropoda: Dinosauria) and its bearing on the evolution of Maniraptora and ecology of the Jehol Fauna. *Vertebrata Palasiatica* 50, 111-139.
- S37. Xu, X., et al. (2012). A gigantic feathered dinosaur from the Lower Cretaceous of China. *Nature* 484, 92-95.
- S38. Martínez, R.D., and Novas, F.E. (2006). *Aniksosaurus darwini* gen. et sp. nov., a new coelurosaurian theropod from the early Late Cretaceous of central Patagonia, Argentina. *Revista del Museo Argentino de Ciencias Naturales* 8, 243-259.
- S39. Kirkland, J.I., Britt, B.B., Whittle, C.H., Madsen, S.K., and Burge, D.L. (1998). A small coelurosaurian theropod from the Yellow Cat Member of the Cedar Mountain Formation (Lower Cretaceous, Barremian) of Eastern Utah. *New Mexico Museum of Natural History and Science Bulletin* 14, 239-248.
- S40. Osmólska, H. (1996). An unusual theropod dinosaur from the Late Cretaceous Nemegt Formation of Mongolia. *Acta Pal. Polonica* 41, 1-38.
- S41. Hone, D.W.E., Wang, K., Sullivan, C., Zhao, X.-J., Chen, S., Li, D., Ji, S., Ji, Q., and Xu, X. (2011). A new, large tyrannosaurine theropod from the Upper Cretaceous of China. *Cret. Res.* 32, 495-503.

- S42. Benson, R.B.J., Carrano, M.T., and Brusatte, S.L. (2010). A new clade of archaic large-bodied predatory dinosaurs (Theropoda: Allosauroidae) that survived to the latest Mesozoic. *Naturwiss.* 97, 71–78.
- S43. Sereno, P.C. (2007). Logical basis for morphological characters in phylogenetics. *Cladistics* 23, 565-587.
- S44. Makovicky, P.J., Li, D., Gao, K.-Q., Lewin, M., Erickson, G.M., and Norell, M.A. (2010). A giant ornithomimosaur from the Early Cretaceous of China. *Proc. R. Soc. London B* 277, 191-198.
- S45. Xu, L., Kobayashi, Y., Lü, J., Lee, Y.-N., Liu, Y., Tanaka, K., Zhang, X., Jia, S., and Zhang, J. (2011). A new ornithomimid dinosaur with North American affinities from the Late Cretaceous Qiupa Formation in Henan Province of China. *Cret. Res.* 32, 213-222.
- S46. M.D. Brazeau. (2011). Problematic character coding methods in morphology and their effects. *Biol. J. Linn. Soc.* 104, 489-498.
- S47. Goloboff, P.A., Farris, J.A., and Nixon, K.C. (2008). TNT, a free program for phylogenetic analysis. *Cladistics* 24, 774-786.
- S48. Coddington, J. A., and Scharff, N. (1994). Problems with zero-length branches. *Cladistics* 10, 415–423.
- S49. Buffetaut, E., Suteethorn, V., and Tong, H. (2009). An early ‘ostrich dinosaur’ (Theropoda: Ornithomimosauria) from the Early Cretaceous Sao Khua Formation of NE Thailand. *Geol. Soc. Lond. Spec. Pub.* 315, 229-243.
- S50. Zhang, F., Zhou, Z., Xu, X., and Wang, X. (2002). A juvenile coelurosaurian theropod from China indicates arboreal habits. *Naturwiss.* 89, 394-398.
- S51. Novas, F.E., Ezcurra, M.D., Agnolin, F.L., Pol, D., and Ortiz, R. (2012). New Patagonian Cretaceous theropod sheds light about the early radiation of Coelurosauria. *Revista del Museo Argentino de Ciencias Naturales* 14, 57-81.
- S52. Sereno, P.C., McAllister, S., and Brusatte, S.L. (2005). TaxonSearch: a relational database for documenting taxa and their phylogenetic definitions. *Phyloinformatics* 8, 1-21.
- S53. Xu, X., Norell, M.A., Kuang, X., Wang, X., Zhao, Q., and Jia, C. (2004). Basal tyrannosauroids from China and evidence for protofeathers in tyrannosauroids. *Nature* 431, 680–684.
- S54. Xu, X., Clark, J.M., Forster, C.A., Norell, M.A., Erickson, G.M., Eberth, D.A., Jia, C., and Zhao, Q. (2006). A basal tyrannosauroid dinosaur from the Late Jurassic of China. *Nature* 439, 715–718.
- S55. Li, D., Norell, M.A., Gao, K., Smith, N.D., and Makovicky, P.J. (2010). A longirostre tyrannosauroid from the Early Cretaceous of China. *Proc. R. Soc. Lond. B* 277, 183-190.
- S56. Rauhut, O.W.M., Milner, A.C., and Moore-Fay, S. (2010). Cranial osteology and phylogenetic position of the theropod dinosaur *Proceratosaurus bradleyi* (Woodward, 1910) from the Middle Jurassic of England. *Zool. J. Linn. Soc.* 158, 155-195.

- S57. Godefroit, P., Cau, A., Dong-Yu, H., Escuillié, F., Wenhao, W., and Dyke, G. (2013). A Jurassic avialan dinosaur from China resolves the early phylogenetic history of birds. *Nature* 498, 359-362.
- S58. Godefroit, P., Demuynck, H., Dyke, G., Hu, D., Escuillié, F., and Claeys, P. (2013). Reduced plumage and flight ability of a new Jurassic paravian theropod from China. *Nat Commun.* 4, 1394.
- S59. Lloyd, G.T., Wang, S.C., and Brusatte, S.L. (2012). Identifying heterogeneity in rates of morphological evolution: discrete character change in the evolution of lungfish. *Evolution* 66, 330-348.
- S60. Ruta, M., Wagner, P.J., Coates, M.I. (2006). Evolutionary patterns in early tetrapods. I. Rapid initial diversification followed by decrease in rates of character change. *Proc. R. Soc. Lond. B* 273, 2107-2111.
- S61. Brusatte, S.L., Benton, M.J., Ruta, M., and Lloyd, G.T. (2008). Superiority, competition, and opportunism in the evolutionary radiation of dinosaurs. *Science* 321, 1485–1488.
- S62. Bapst, D.W. (2012). Paleotree: an R package for paleontological and phylogenetic analyses of evolution. *Meth. Ecol. Evol.* 3, 803-807.
- S63. Revell, L.J. (2012). phytools: an R package for phylogenetic comparative biology (and other things). *Meth. Ecol. Evol.* 3, 217-223.
- S64. Laurin, M., Gussekloo, S.W.S., Marjanović, D., Legendre, L., and Cubo, J. (2012). Testing gradual and speciation models of evolution in extant taxa: the example of ratites. *J. Evol. Biol.* 25, 293-303.
- S65. Fitch, W.M., and Bruschi, M. (1987). The evolution of prokaryotic ferredoxins—with a general method for correcting for unobserved substitutions in less branched lineages. *Mol. Biol. Evol.* 4, 381-394.
- S66. Wills, M.A., Briggs, D.E.G., and Fortey, R.A. (1994). Disparity as an evolutionary index: a comparison of Cambrian and Recent arthropods. *Paleobiol.* 20, 93-131.
- S67. Wills, M.A. (1998). Crustacean disparity through the Phanerozoic: comparing morphological and stratigraphic data. *Biol. J. Linn. Soc.* 65, 455–500.
- S68. Brusatte, S.L., Benton, M.J., Ruta, M., and Lloyd, G.T. (2008). The first 50 myr of dinosaur evolution: macroevolutionary pattern and morphological disparity. *Biol. Lett.* 4, 733–736.
- S69. Brusatte, S.L., Nesbitt, S.J., Irmis, R.B., Butler, R.J., Benton, M.J., and Norell, M.A. (2010). The origin and early radiation of dinosaurs. *Earth-Sci. Rev.* 101, 68-100.
- S70. Brusatte, S.L., Montanari, S., Yi, H.-Y., and Norell, M.A. (2011). Phylogenetic corrections for morphological disparity analysis: new methodology and case studies. *Paleobiol.* 37, 1–22.

- S71. Brusatte, S.L., Benton, M.J., Ruta, M., Lloyd, G.T., and Wang, S.C. (2011). Macroevolutionary patterns in the evolutionary radiation of archosaurs (Tetrapoda: Diapsida). *Earth Env. Sci. Trans. R. Soc. Edinburgh* *101*, 367-382.
- S72. Brusatte, S.L., Butler, R.J., Prieto-Marquez, A., and Norell, M.A. (2012). Dinosaur morphological diversity and the end-Cretaceous extinction. *Nat. Comms.* *3*, 804 (DOI: 10.1038/ncomms1815).
- S73. Ruta, M. (2009). Patterns of morphological evolution in major groups of Palaeozoic Temnospondyli (Amphibia: Tetrapoda). *Spec. Pap. Palaeontol.* *81*, 91-120.
- S74. Cisneros, J.C., and Ruta, M. (2010). Morphological diversity and biogeography of procolophonids (Amniota: Parareptilia). *J. Syst. Palaeontol.* *8*, 607-625.
- S75. Young, M.T., Brusatte, S.L., Ruta, M., and Andrade, M.B. (2010). The evolution of Metriorhynchoidea (Mesoeucrocodylia: Thalattosuchia): an integrated approach using geometric morphometrics, analysis of disparity and biomechanics. *Zool. J. Linn. Soc.* *158*, 801-859.
- S76. Prentice, K.C., Ruta, M., and Benton, M.J. (2011). Evolution of morphological disparity in pterosaurs. *J. Syst. Palaeontol.* *9*, 337-353.
- S77. Thorne, P.M., Ruta, M., and Benton, M.J. (2011). Resetting the evolution of marine reptiles at the Triassic-Jurassic boundary. *Proc. Nat. Acad. Sci. USA* *108*, 8339-8344.
- S78. Benson, R.B.J., Evans, M., and Druckenmiller, P.S. (2012). High diversity, low disparity and small body size in plesiosaurs (Reptilia: Sauropterygia) from the Triassic-Jurassic boundary. *PLoS ONE* *7*(3), e31838.
- S79. Butler, R.J., Brusatte, S.L., Andres, B., and Benson, R.B.J. (2012). How do geological sampling biases affect studies of morphological evolution in deep time? A case study of pterosaur (Reptilia: Archosauria) disparity. *Evolution* *66*, 147-162.
- S80. Wagner, P.J. (1997). Patterns of morphologic diversification among the Rostroconchia. *Paleobiol.* *23*, 115-150.
- S81. Hammer, O., Harper, D.A.T., and Ryan, P.D. (2001). Paleontological statistics software package for education and data analysis. *Pal. Elect.* *4*, 1-9.
